# Supplementary material for: No robust reduction of infarct size and no-reflow by metoprolol pretreatment in adult Göttingen minipigs
Source: Springer Nature journal article supplement (doi:10.1007/s00395-023-00993-4), 2023-06-08
Supplement: MOESM1 [file 25463504]

**Supplemental Table. Area at risk, regional myocardial blood flow, heart rate and left ventricular pressure in pigs undergoing ischaemia/reperfusion without and with twice 1 mg kg<sup>-1</sup> (pretreatment plus treatment from 30 to 40 min ischaemia) metoprolol.**

|                                                                                  | I/R        |                                                 | metoprolol+I/R                                  |  | statistics                                                                          |
|----------------------------------------------------------------------------------|------------|-------------------------------------------------|-------------------------------------------------|--|-------------------------------------------------------------------------------------|
| <b>AAR</b><br>(% LV)                                                             | 24±7       |                                                 | 22±4                                            |  | <i>p</i> =0.5691                                                                    |
| <b>episodes of ventricular fibrillation/defibrillation</b>                       | 2±2        |                                                 | 2±1                                             |  | <i>p</i> =0.9321                                                                    |
| <b>regional myocardial blood flow</b><br>(ml min <sup>-1</sup> g <sup>-1</sup> ) | baseline   | 0.965± 0.151                                    | 0.856± 0.230                                    |  | <i>protocol: p</i> =0.5467; <i>time: p</i> <0.0001; <i>time*protocol: p</i> =0.5844 |
|                                                                                  | metoprolol |                                                 | 0.955± 0.234                                    |  |                                                                                     |
|                                                                                  | I5         | 0.074± 0.021 <sup>&lt;0.0001 baseline</sup> vs. | 0.035± 0.014 <sup>&lt;0.0001 baseline</sup> vs. |  |                                                                                     |
|                                                                                  | I55        | 0.038± 0.013 <sup>&lt;0.0001 baseline</sup> vs. | 0.021± 0.016 <sup>&lt;0.0001 baseline</sup> vs. |  |                                                                                     |
|                                                                                  | R10        | 1.022± 0.217                                    | 0.663± 0.117 <sup>0.0122 baseline</sup> vs.     |  |                                                                                     |
|                                                                                  | R180       | 0.780± 0.081 <sup>0.0108 baseline</sup> vs.     | 0.619± 0.165 <sup>0.0021 baseline</sup> vs.     |  |                                                                                     |
|                                                                                  | baseline   | 100± 0                                          | 99± 10                                          |  | <i>protocol: p</i> =0.2930; <i>time: p</i> =0.4032; <i>time*protocol: p</i> =0.4979 |
|                                                                                  | metoprolol |                                                 | 97± 7                                           |  |                                                                                     |
| <b>heart rate</b><br>(1 min <sup>-1</sup> )                                      | I5         | 101± 1                                          | 97± 9                                           |  |                                                                                     |
|                                                                                  | I55        | 96± 9                                           | 102± 3                                          |  |                                                                                     |
|                                                                                  | R10        | 100± 4                                          | 104± 6                                          |  |                                                                                     |
|                                                                                  | R180       | 102± 4                                          | 107± 13                                         |  |                                                                                     |
| <b>LVP<sub>max</sub></b><br>(mmHg)                                               | baseline   | 85± 2                                           | 96± 7                                           |  | <i>protocol: p</i> =0.0217; <i>time: p</i> <0.0001; <i>time*protocol: p</i> =0.5613 |
|                                                                                  | metoprolol |                                                 | 89± 10                                          |  |                                                                                     |
|                                                                                  | I5         | 77± 6                                           | 77± 10 <sup>&lt;0.0001 baseline</sup> vs.       |  |                                                                                     |
|                                                                                  | I55        | 70± 10 <sup>0.0004 baseline</sup> vs.           | 69± 10 <sup>&lt;0.0001 baseline</sup> vs.       |  |                                                                                     |
|                                                                                  | R10        | 68± 9 <sup>&lt;0.0001 baseline</sup> vs.        | 73± 12 <sup>&lt;0.0001 baseline</sup> vs.       |  |                                                                                     |
|                                                                                  | R180       | 65± 9 <sup>&lt;0.0001 baseline</sup> vs.        | 73± 11 <sup>0.0002 baseline</sup> vs.           |  |                                                                                     |

Area at risk (AAR); ischaemia/reperfusion (I/R); 5 min ischaemia (I5); 55 min ischaemia (I55); left ventricle (LV); left ventricular pressure (LVP); 10 min reperfusion (R10); 180 min reperfusion (R180); area at risk was analysed by an unpaired two-sided t-test; the number of episodes of ventricular fibrillation/defibrillation during ischaemia was not normally distributed and subjected to an aligned-rank transformation (art) before analysis; haemodynamic and regional myocardial blood flow data were analysed by two-way analysis of variance (protocol. time) for repeated measures.
